# Supplementary material
Source: Copernicus journal article supplement (doi:10.5194/egusphere-2026-2841)
Supplement: Supplementary file 1 [file egusphere-2026-2841-supplement.pdf]

# Supplement of ‘The role of the QBO for tropical high-cloud variability in CMIP6 models and observations’

Aleena M. Jaison<sup>1</sup>, Paulo Ceppi<sup>1</sup>, Sarah Wilson Kemsley<sup>2</sup>

<sup>1</sup>Department of Physics, Imperial College London, London, United Kingdom

<sup>2</sup>School of Geography and the Environment, University of Oxford, Oxford, United Kingdom

Correspondence to: Aleena M. Jaison (a.moolakkunnel-jaison@imperial.ac.uk)

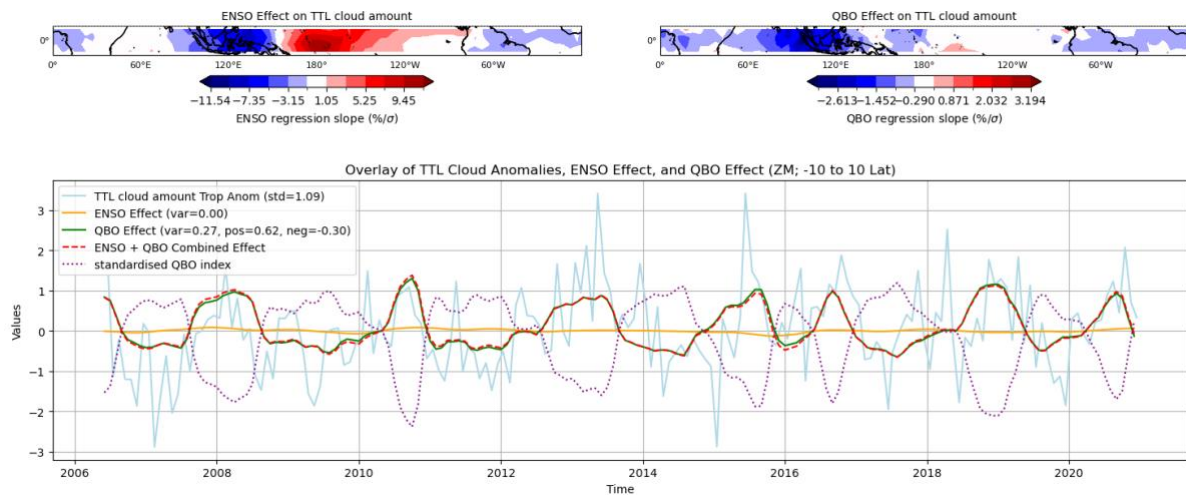

Figure S1: Tropical TTL cloud amount anomalies over time. ENSO and QBO contributions are shown as yellow and green line respectively.

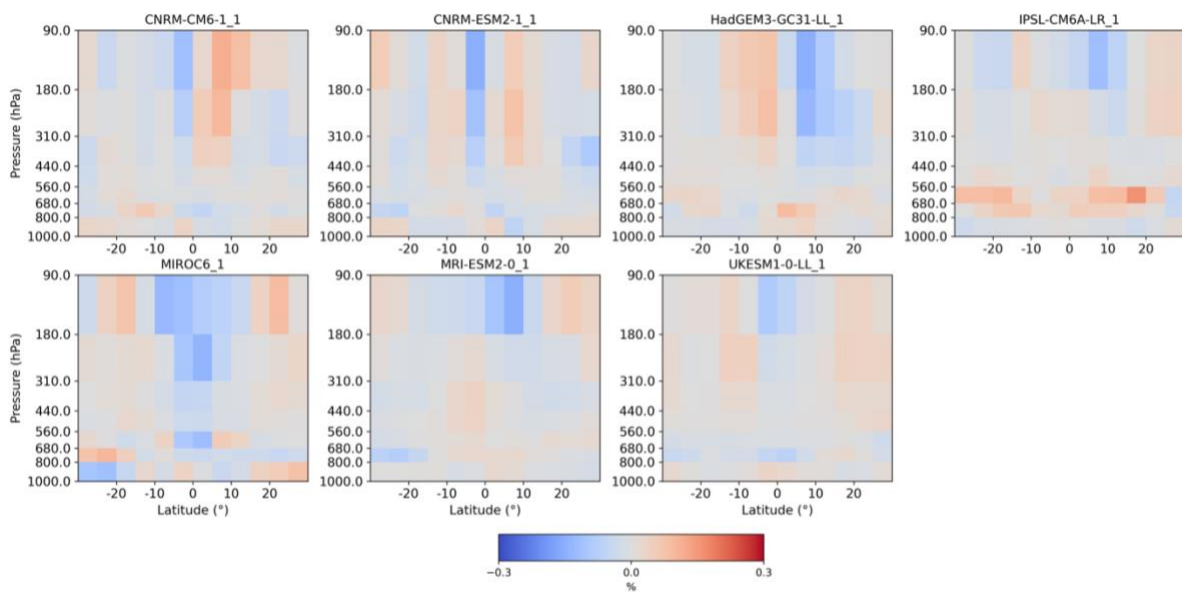

Figure S2: Same as figure 1i but for individual models.

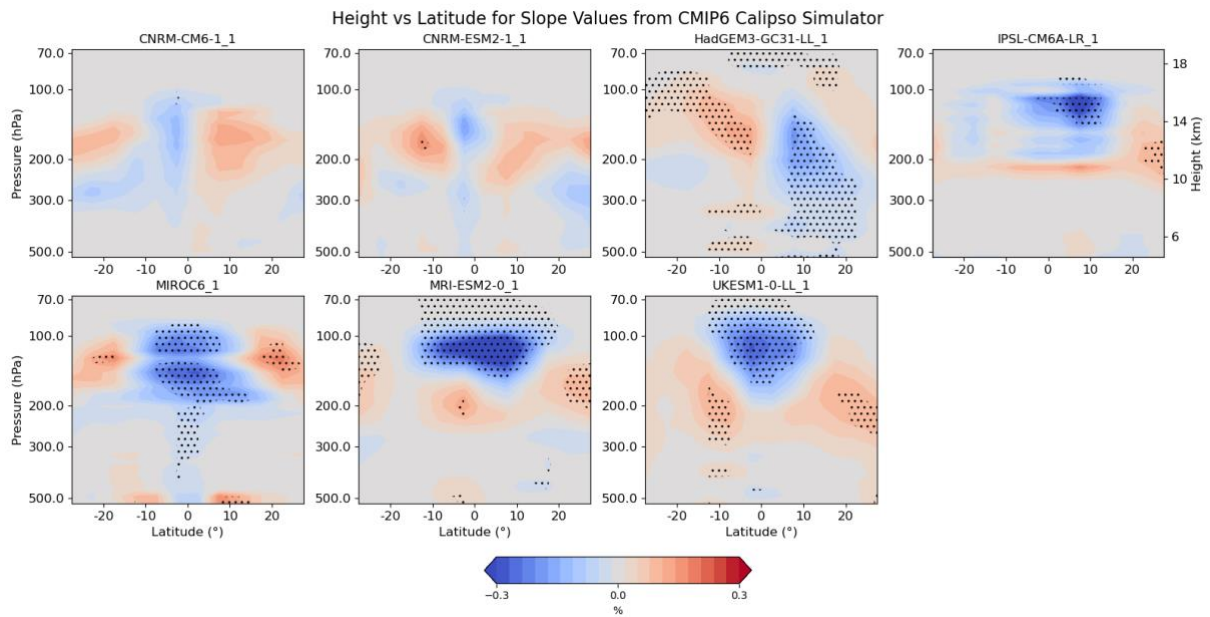

Figure S3: Same as figure 1j but for individual models. Stippling marks statistically significant results (95% confidence).

### QBO-regression of high cloud amount (ENSO removed)

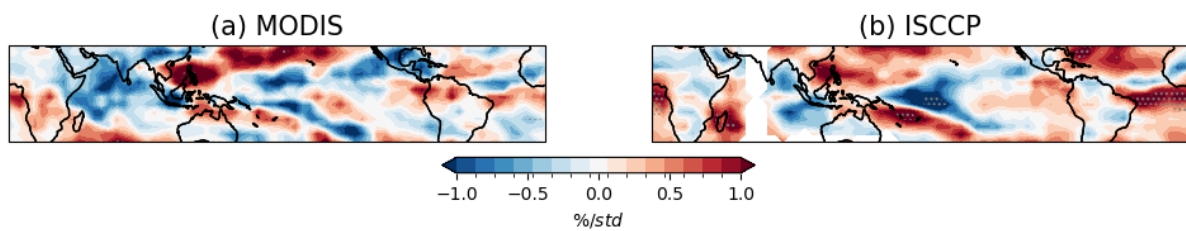

Figure S4: QBO regressed high-cloud fraction (<440hPa) from (a) MODIS and (b) ISCCP

QBO-regression of high cloud amount (ENSO removed); stdQBOE5

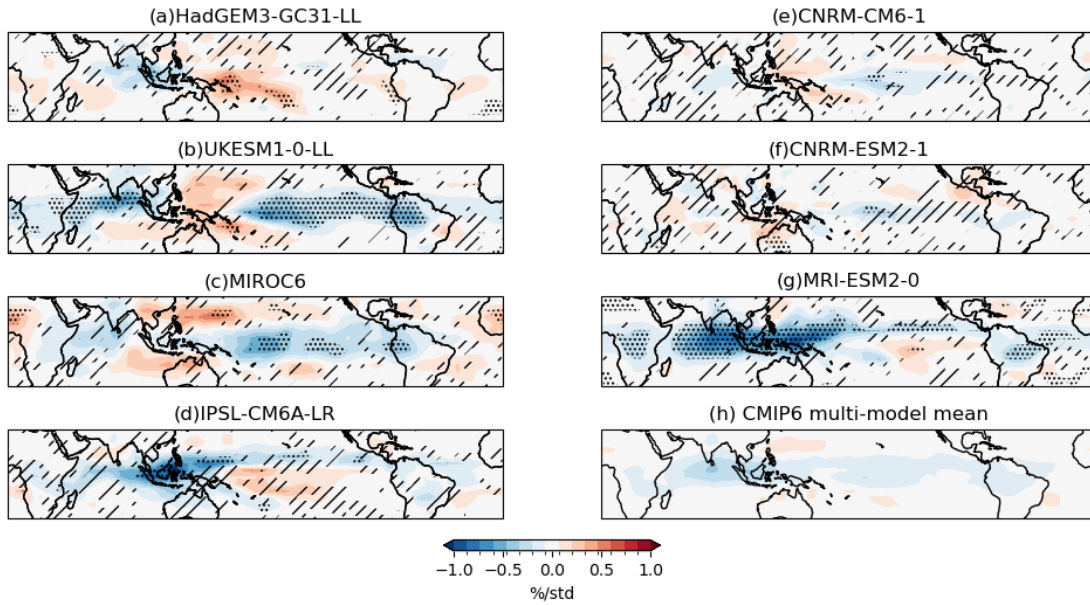

Figure S5: Same as figure 2d but for individual models. Hatching denotes regions from QBO regression on 20-year segments did not agree on sign in 5 out of 8 segments.

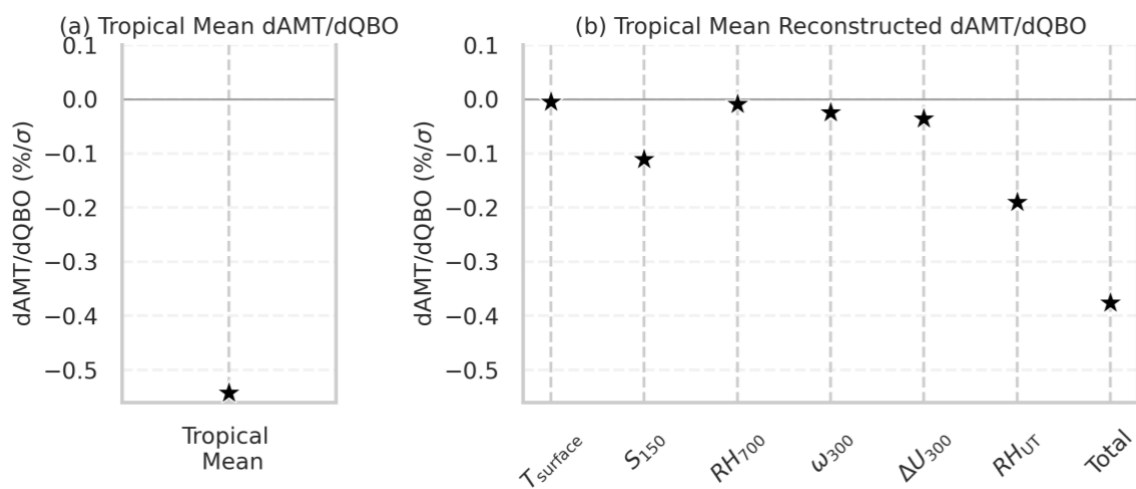

Figure S6: (a) Tropical mean (10S–10N) of QBO-regressed TTL cloud fraction in observations (b) Individual CCF contributions to the observed tropical-mean QBO-induced TTL cloud response and the total.

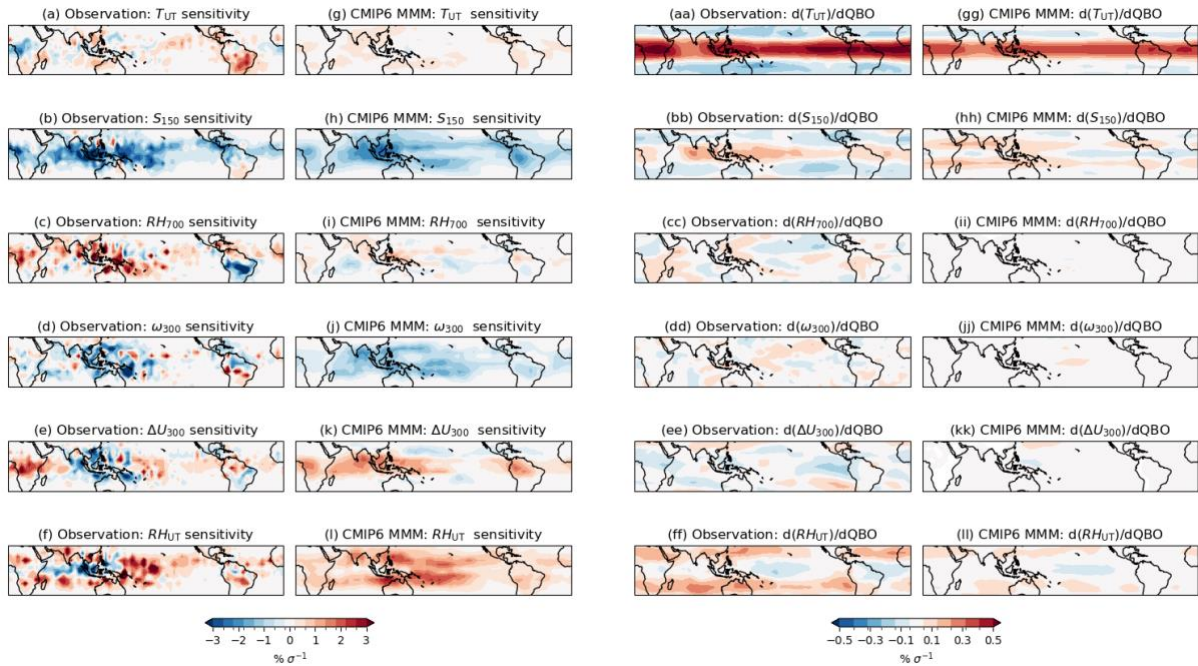

Figure S7: Similar to figure 4, but for all CCFs. Historically derived sensitivities of the TTL cloud fraction to CCFs in observation (a-f) and CMIP6 MMM (g-l). QBO-regressed CCFs, in units of standard deviation of CCF per standard deviation of QBO, in observation (aa-ff) and CMIP6 MMM (gg-ll).

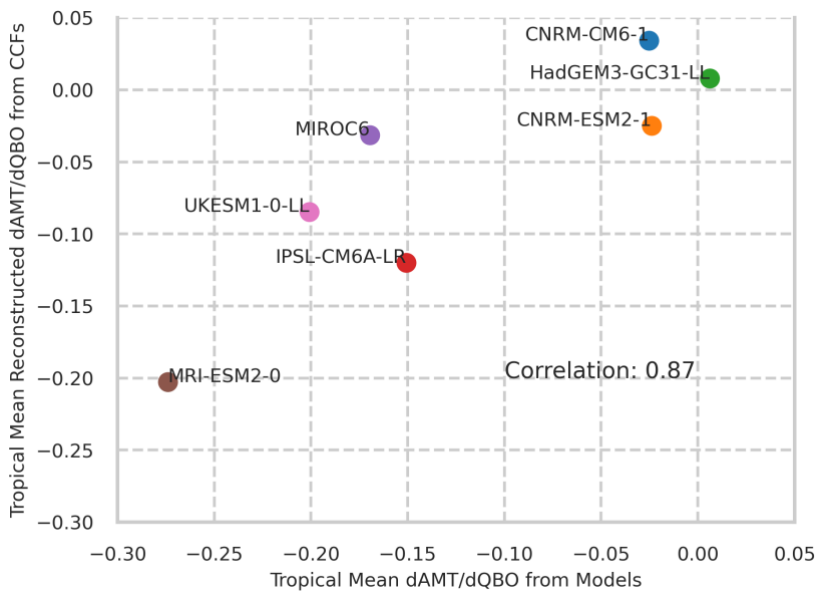

Figure S8: correlation between QBO-regressed TTL cloud fraction and its corresponding CCF-based reconstruction across CMIP6 models.
